# Supplementary material for: Exploring the diagnostic effectiveness for myocardial ischaemia based on CCTA myocardial texture features
Source: Springer Nature journal article supplement (doi:10.1186/s12872-021-02206-z), 2021-08-31
Supplement: MOESM1 [file 19615606]

**Table 1** The contrast media injection protocol\*

| BMI         | Weight   |          |          |          |          | BMI      | Weight   |          |          |          |          |
|-------------|----------|----------|----------|----------|----------|----------|----------|----------|----------|----------|----------|
|             | <50 kg   | 50~60 kg | 60~70 kg | 70~80 kg | >80 kg   |          | 65~70 kg | 70~75 kg | 75~80 kg | 80~90 kg | >90 kg   |
| BMI<19      | 3.0 ml/s |          |          |          |          | 27 ≧ BMI | 4.6 ml/s | 4.8 ml/s | 5.2 ml/s | 5.5 ml/s | 5.8 ml/s |
| 19 ≧ BMI<23 | 3.5 ml/s | 3.5 ml/s | 3.8 ml/s | 4.0 ml/s | 4.0 ml/s |          |          |          |          |          |          |
| 23 ≧ BMI<27 | 3.5 ml/s | 3.8 ml/s | 4.3 ml/s | 5.0 ml/s | 5.2 ml/s |          |          |          |          |          |          |

\*The duration of coronary injection was 12s. When the heart rate was increased by 5 beats/min on the basis of 75 beats/min, the injection rate was added 0.2ml/s, and the dosage was also increased. The rate of saline was the same as the injection rate of contrast agent, and the dosage was 30 ml.
